# Supplementary material for: Ethnomedicinal plant knowledge and practice of the Oromo ethnic group in southwestern Ethiopia
Source: PubMed Central journal article supplement (PMC2390512; doi:10.1186/1746-4269-4-11), 2008-04-29
Supplement: 1746-4269-4-11-S2.pdf [file 1746-4269-4-11-S2.pdf]

Additional file 2. Plant species of medicinal use to treat human ailments, parts used, mode of preparation and application

| Human Disease                                                                                                | Scientific name                                | Family        | Local name           | Voucher    | Part Used    | Methods of preparation                 | Route of administration | Methods of application | Condition of part used |
|--------------------------------------------------------------------------------------------------------------|------------------------------------------------|---------------|----------------------|------------|--------------|----------------------------------------|-------------------------|------------------------|------------------------|
| Abdominal distension<br>( <i>Gara Kassa</i> )<br><i>Afura lafaa</i><br>( <i>yhitsanatin fit yemiasabit</i> ) | <i>Momordica foetida</i> Schumach.             | Cucurbitaceae | Hidda Boffaa/Buqee   | Ha & De 48 | Leaves       | Crushed, squeezed, mixed with water    | Oral                    | Drinking               | Fresh                  |
|                                                                                                              | <i>Cordia africana</i> Lam.                    | Boraginaceae  | Wodessaa             | Ha & De 85 | Leaves       | Extracted with cold water              | Oral                    | Drinking               | Fresh                  |
|                                                                                                              | <i>Datura stramonium</i> L.                    | Solanaceae    | Asangiraa            | Ha & De 38 | Leaves       | Extracted with cold water              | Oral                    | Drinking               | Fresh                  |
|                                                                                                              | <i>Premna schimperi</i> Engl.                  | Verbenaceae   | Urgessa              | Ha & De 4  | Leaves       | Extracted with cold water              | Oral                    | Drinking               | Fresh                  |
|                                                                                                              | <i>Clerodendrum myricoides</i> (Hochst.) Vatke | Lamiaceae     | Marasisa             | Ha & De 82 | Leaves       | Extracted with cold water              | Oral                    | Drinking               | Fresh                  |
| Allergies<br>( <i>Abiato, shererit</i> )                                                                     | <i>Alysicarpus quartinianus</i> A. Rich.       | Fabaceae      | Hadhaa/Korcha Hadhaa | Ha & De 15 | Root, leaves | Crushed, used alone                    | Topical                 | Topical application    | Fresh                  |
|                                                                                                              | <i>Croton macrostachyus</i> Del.               | Euphorbiaceae | Makanissaa           | Ha & De 6  | Leaves       | Pounded, squeezed; powdered, concocted | Topical                 | Topical application    | Fresh or dried         |
|                                                                                                              | <i>Vernonia amygdalina</i> Del.                | Asteraceae    | Ebichaa              | Ha & De 30 | Leaves       | Pounded, squeezed; powdered, concocted | Topical                 | Topical application    | Fresh or dried         |
|                                                                                                              | <i>Premna schimperi</i> Engl.                  | Verbenaceae   | Urgessa              | Ha & De 4  | Leaves       | Pounded, squeezed; powdered, concocted | Topical                 | Topical application    | Fresh or dried         |
| Allergies<br>( <i>Araabuu</i> )                                                                              | <i>Oxalis radicata</i> A. Rich.                | Oxalidaceae   | Soqideretii          | Ha & De 21 | Leaves       | Squeezed with water                    | Oral                    | Drinking               | Fresh                  |
| Allergies<br>( <i>Ramoo</i> )                                                                                | <i>Galium simense</i> Fresen.                  | Rubiaceae     | Matane               | Ha & De 94 | Whole        | Crushed, extracted with cold water     | Topical                 | Topical application    | Fresh                  |
| Amoebiasis                                                                                                   | <i>Alysicarpus quartinianus</i> A. Rich.       | Fabaceae      | Hadhaa/Korcha Hadhaa | Ha & De 15 | Root         | Powdering, mixed with garlic           | Oral                    | Swallowing             | Dried                  |

Additional file 2 (Continued)

| Human Disease                         | Scientific name                                           | Family        | Local name          | Voucher       | Part Used                  | Methods of preparation                    | Route of administration | Methods of application | Condition of part used |
|---------------------------------------|-----------------------------------------------------------|---------------|---------------------|---------------|----------------------------|-------------------------------------------|-------------------------|------------------------|------------------------|
| Anaemia<br>( <i>Dhidhina Mataa</i> )  | <i>Solanecio angulatus</i><br>(Vahl) C. Jeffrey           | Asteraceae    | haqarqaraa/ gabisa  | Ha & De<br>12 | Leaves                     | Crushed, mixed<br>with butter             | Topical                 | Topical<br>application | Fresh                  |
| Anaemia<br>( <i>Hiireenaa Daga</i> )  | <i>Hypoestes triflora</i><br>(Forssk.) Roem. &<br>Schult. | Acanthaceae   | Togoo               | Ha & De<br>9  | Leaves                     | Decoction,<br>mixed with sugar            | Oral                    | Drinking               | Fresh                  |
| <i>Asabal</i>                         | <i>Chamaecrista<br/>mimosoides</i> (L.) Greene            | Fabaceae      | Qoricha Sabal       | HA & De<br>56 | Roots,<br>fruits           | Crushed,<br>Squeezed with<br>water        | Oral                    | Drinking               | Fresh                  |
| Blister ( <i>Shao</i> )               | <i>Solanum incanum</i> L.                                 | Solanaceae    | Hiddii              | HA & De<br>16 | Leaves &<br>fruits         | Crushed,<br>squeezed, used<br>alone       | Topical                 | Ointment               | Fresh                  |
| Constipation<br>( <i>Bokokkaa</i> )   | <i>Solanecio angulatus</i><br>(Vahl) C. Jeffrey           | Asteraceae    | haqarqaraa/ gabisa  | Ha & De<br>12 | Leaves                     | Squeezed with<br>water                    | Oral                    | Drinking               | Fresh                  |
| Cut ( <i>Madaa</i> )                  | <i>Croton macrostachyus</i><br>Del.                       | Euphorbiaceae | Makanissaa          | Ha & De<br>6  | Leaves,<br>leaf<br>exudate | Crushed, used<br>alone                    | Topical                 | Topical<br>application | Fresh                  |
| Diabetes<br>( <i>Dhukuba Lafa</i> )   | <i>Datura stramonium</i> L.                               | Solanaceae    | Asangiraa           | Ha & De<br>38 | Leaves                     | Crushed,<br>squeezed with<br>water        | Oral                    | Drinking               | Fresh                  |
|                                       | <i>Sapium ellipticum</i><br>(Krauss ) Pax                 | Euphorbiaceae | Bosoqaa             | Ha & De<br>57 | Leaves                     | Crushed,<br>squeezed with<br>water        | Oral                    | Drinking               | Fresh                  |
| Diarrhoea<br>( <i>Gara Kassaa</i> )   | <i>Tragia mitis</i> Muell. Arg.                           | Euphorbiaceae | Guubduu             | Ha & De<br>10 | Root                       | Crushed, mixed<br>with water and<br>sugar | Oral                    | Drinking               | Fresh                  |
| Diarrhoea<br>( <i>Kaassaa</i> )       | <i>Hypericum<br/>quartinianum</i> A. Rich.                | Hypericaceae  | Uleefoonii          | Ha & De<br>82 | Leaves                     | Extracted with<br>cold water              | Oral                    | Drinking               | Fresh                  |
|                                       | <i>Hibiscus ovalifolius</i><br>(Forssk.) Vahl             | Malvaceae     | Code 4              | Ha & De<br>83 | Leaves                     | Extracted with<br>cold water              | Oral                    | Drinking               | Fresh                  |
|                                       | <i>Cyphostemma<br/>dembianense</i> (Chiov.)<br>Vollesen   | Vitaceae      | Code 5              | Ha & De<br>23 | Leaves                     | Extracted with<br>cold water              | Oral                    | Drinking               | Fresh                  |
| Earache<br>( <i>Tessissaa Gura</i> )  | <i>Datura stramonium</i> L.                               | Solanaceae    | Asangiraa           | Ha & De<br>38 | Seeds                      | Powdered, mixed<br>with water             | Auricular               | Dropping               | Dried                  |
| Eczema<br>( <i>Chiefee, Abiatoo</i> ) | <i>Ficus sycomorus</i> L.                                 | Moraceae      | Balantai/Balansofii | Ha & De<br>14 | Stem bark                  | Powdering                                 | Topical                 | Topical<br>application | Dried                  |
|                                       | <i>Vernonia myriantha</i><br>Hook.f.                      | Asteraceae    | Reji                | Ha & De<br>35 | Leaves                     | Crushing                                  | Topical                 | Topical<br>application | Fresh                  |

Additional file 2 (Continued)

| Human Disease                                                 | Scientific name                                 | Family         | Local name           | Voucher    | Part Used    | Methods of preparation        | Route of administration | Methods of application | Condition of part used |
|---------------------------------------------------------------|-------------------------------------------------|----------------|----------------------|------------|--------------|-------------------------------|-------------------------|------------------------|------------------------|
| Eczema ( <i>Sibijii</i> )                                     | <i>Sida ovata</i> Forssk.                       | Malvaceae      | Karaabaa             | Ha & De 87 | Leaves       | Crushed, used alone           | Topical                 | Topical application    | Fresh                  |
|                                                               | <i>Erythrina brucei</i> Schweinf.               | Fabaceae       | Wolensuu             | Ha & De 20 | Stem bark    | Crushed, mixed with water     | Topical                 | Washing, the lesions)  | Fresh                  |
|                                                               | <i>Thalictrum rhyngocarpum</i> Dill. & A. Rich. | Ranunculaceae  | Qoricha Sibijii      | Ha & De 58 | Roots        | Powdered, mixed with water    | Topical                 | Topical application    | Dried                  |
| Evil eye ( <i>Budaa</i> )                                     | <i>Withania somnifera</i> (L.) Dun.             | Solanaceae     | Qorcha Buda (gizawa) | Ha & De 41 | Leaves       | Squeezed, used alone          | Oral                    | Drinking               | Fresh                  |
| Febrile Illness ( <i>Michii</i> )                             | <i>Ocimum lamiifolium</i> Hochst. ex Benth.     | Lamiaceae      | Damakessie           | Ha & De 8  | Leaves       | Pounded, squeezed, used alone | Oral, Topical           | Drinking, Rubbing      | Fresh                  |
| Flu ( <i>Busaa</i> )                                          | <i>Ocimum lamiifolium</i> Hochst. ex Benth.     | Lamiaceae      | Damakessie           | Ha & De 8  | Leaves       | Crushed, mixed with water     | Oral                    | Drinking               | Fresh                  |
| Gastritis ( <i>Cheguara</i> )                                 | <i>Clausena anisata</i> (Willd.) Benth.         | Rutaceae       | Ulmaye               | Ha & De 37 | Leaves       | Crushed, decoction            | Oral                    | Drinking               | Fresh                  |
| Gland TB ( <i>Naqarsaa</i> )                                  | <i>Premna schimperi</i> Engl.                   | Verbenaceae    | Urgessa              | Ha & De 4  | Leaves       | Crushed, Squeezed with water  | Oral                    | Drinking               | Fresh                  |
|                                                               | <i>Myrica salicifolia</i> A. Rich.              | Myricaceae     | Nolee                | Ha & De 59 | Leaves       | Crushed, Squeezed with water  | Oral                    | Drinking               | Fresh                  |
|                                                               | <i>Myrsine africana</i> L.                      | Myrsinaceae    | Qachamaa             | Ha & De 60 | Leaves       | Crushed, Squeezed with water  | Oral                    | Drinking               | Fresh                  |
|                                                               | <i>Clausena anisata</i> (Willd.) Benth.         | Rutaceae       | Ulmaye               | Ha & De 37 | Leaves       | Crushed, Squeezed with water  | Oral                    | Drinking               | Fresh                  |
|                                                               | <i>Alysicarpus quartianus</i> A. Rich.          | Fabaceae       | Hadhaa/Korcha Hadhaa | Ha & De 15 | Leaves       | Crushed, Squeezed with water  | Oral                    | Drinking               | Fresh                  |
| Gonorrhoea ( <i>Dhukuba</i> , <i>Dhiraa</i> , <i>Chebto</i> ) | <i>Momordica foetida</i> Schumach.              | Cucurbitaceae  | Hidda Boffaa/Buqee   | Ha & De 48 | Roots        | Crushed, squeezed with water  | Intravenous             | Injection              | Fresh                  |
|                                                               | <i>Croton macrostachyus</i> Del.                | Euphorbiaceae  | Makanissaa           | Ha & De 6  | Fruits, root | Pounded, mixed with water     | Oral                    | Drinking               | Fresh                  |
|                                                               | <i>Kanahia laniflora</i> (Forssk.) R. Br.       | Asclepiadaceae | Shershera            | Ha & De 64 | Root         | Pounded, mixed with water     | Oral                    | Drinking               | Fresh                  |

Additional file 2 (Continued)

| Human Disease                                                          | Scientific name                                   | Family        | Local name                | Voucher        | Part Used               | Methods of preparation                             | Route of administration | Methods of application | Condition of part used |
|------------------------------------------------------------------------|---------------------------------------------------|---------------|---------------------------|----------------|-------------------------|----------------------------------------------------|-------------------------|------------------------|------------------------|
| Gonorrhoea<br>( <i>Dhukuba</i> ,<br><i>Dhiraa</i> ,<br><i>Chebto</i> ) | <i>Oreosyce africana</i><br>Hook.f.               | Cucurbitaceae | Hiddii                    | Ha & De<br>45  | Leaves                  | Concoction,<br>Crushed,<br>squeezed with<br>water  | Oral                    | Drinking               | Fresh                  |
|                                                                        | <i>Entada abyssinica</i> Steud.<br>ex A. Rich.    | Fabaceae      | Haambalaa                 | Ha & De<br>46  | Leaves                  | Concoction,<br>Crushed,<br>squeezed with<br>water  | Oral                    | Drinking               | Fresh                  |
| Haemorrhoids<br>( <i>Kormomo</i> ,<br><i>Kintaroti</i> )               | <i>Gardenia ternifolia</i><br>Schumach. & Thonn.  | Rubiaceae     | Kambeelloo/Gambe<br>elloo | Ha & De<br>5   | Fruit                   | Crushed,<br>powdered,<br>concoction, used<br>alone | Topical                 | Topical<br>application | Fresh or<br>dried      |
| Headache<br>( <i>Bowo Mata</i> )                                       | <i>Vernonia amygdalina</i><br>Del.                | Asteraceae    | Ebichaa                   | Ha & De<br>30  | Leaves                  | Pounded, mixed<br>with water                       | Oral                    | Drinking               | Fresh                  |
| Headache<br>( <i>Bowo</i> )                                            | <i>Ocimum lamiifolium</i><br>Hochst. ex Benth.    | Lamiaceae     | Damakessie                | Ha & De<br>8   | Leaves                  | Squeezed with<br>water                             | Nasal                   | Dropping               | Fresh                  |
| Heart failure<br>( <i>Yelib dikam</i> )                                | <i>Entada abyssinica</i> Steud.<br>ex A. Rich.    | Fabaceae      | Haambalaa                 | Ha & De<br>46  | Stem<br>bark,<br>leaves | Crushed,<br>powdered, used<br>alone                | Oral                    | Drinking               | Dried                  |
| Helimenthic<br>infection<br>( <i>Raamoo</i> )                          | <i>Citrus limon</i> (L.) Burm.<br>f.              | Rutaceae      | Lomiya                    | Ha & De<br>13  | Fruit                   | Squeezed alone,<br>mixed with water                | Oral                    | Drinking               | Fresh                  |
| Insect bite<br>( <i>Hadhaa</i> )                                       | <i>Alysicarpus quartinianus</i><br>A. Rich.       | Fabaceae      | Hadhaa/Korcha<br>Hadhaa   | Ha & De<br>15  | Leaves                  | Crushed,<br>warmed, used<br>alone                  | Topical                 | Topical<br>application | Fresh                  |
|                                                                        | <i>Cassia arereh</i> Del.                         | Fabaceae      | Botoroo                   | Ha & De<br>18  | Stem bark               | Crushed, used<br>alone                             | Topical                 | Topical<br>application | Fresh or<br>dried      |
|                                                                        | <i>Alysicarpus quartinianus</i><br>A. Rich.       | Fabaceae      | Hadhaa/Korcha<br>Hadhaa   | Ha & De<br>15  | Root                    | Crushed, used<br>alone                             | Topical                 | Topical<br>application | Fresh                  |
|                                                                        | <i>Canavalia africana</i><br>Dunn                 | Fabaceae      | Otongoraa<br>(adengware)  | Ha & De<br>92  | Leaves                  | Crushed,<br>warmed, used<br>alone                  | Topical                 | Topical<br>application | Fresh                  |
| Loss of hair<br>( <i>Toro</i> )                                        | <i>Afrocarpus falcatus</i><br>(Thunb.) C. N. Page | Podocarpaceae | Birbirsa                  | Ha & De<br>107 | Leaves                  | Crushed, mixed<br>with butter                      | Topical                 | Topical<br>application | Fresh                  |
|                                                                        | <i>Solanum incanum</i> L.                         | Solanaceae    | Hiddii                    | HA & De<br>16  | Leaves                  | Crushed, mixed<br>with butter                      | Topical                 | Topical<br>application | Fresh                  |
| Madness<br>( <i>Maraatuu</i> )                                         | <i>Salix subserrata</i> Willd.                    | Salicaceae    | Aleltu                    | HA & De<br>53  | Leaves                  | Concoction,<br>crushed,<br>squeezed with<br>water  | Oral                    | Drinking               | Fresh                  |

Additional file 2 (Continued)

| Human Disease                                | Scientific name                                           | Family        | Local name              | Voucher     | Part Used | Methods of preparation                                       | Route of administration | Methods of application | Condition of part used |
|----------------------------------------------|-----------------------------------------------------------|---------------|-------------------------|-------------|-----------|--------------------------------------------------------------|-------------------------|------------------------|------------------------|
| Madness<br>( <i>Maraatuu</i> )               | <i>Datura stramonium</i> L.                               | Solanaceae    | Asangiraa               | Ha & De 38  | Leaves    | Concoction, crushed, squeezed with water                     | Oral                    | Drinking               | Fresh                  |
|                                              | <i>Justicia schimperiana</i> (Hochst. ex Nees) T. Anders. | Acanthaceae   | Dhumugaa                | Ha & De 26  | Leaves    | Concoction, crushed, squeezed with water                     | Oral                    | Drinking               | Fresh                  |
|                                              | <i>Clerodendrum myricoides</i> (Hochst.) Vatke            | Lamiaceae     | Marasisa                | Ha & De 82  | Leaves    | Concoction, crushed, squeezed with water                     | Oral                    | Drinking               | Fresh                  |
| Malaria ( <i>Bossa</i> )                     | <i>Gardenia ternifolia</i> Schumach. & Thonn.             | Rubiaceae     | Kambeelloo/Gambeelloo   | Ha & De 5   | Stem bark | Crushed, extracted with cold water                           | Oral                    | Drinking               | Dried                  |
| Menstrual disorder<br>(yalememtat)           | <i>Gloriosa superba</i> L.                                | Colchicaceae  | Dawaurahman/Rah maldawa | Ha & De 3   | Roots     | Crushed, mixed with sugar                                    | Oral                    | Swallowing             | Fresh                  |
| Nasal infection<br>( <i>Afincha legema</i> ) | <i>Carissa spinarum</i> L.                                | Apocynaceae   | Hagamssaa               | Ha & De 90  | Root      | enclosing a piece of the root in slice of clove for smelling | Nasal                   | Smelling               | Fresh                  |
| Nerve pbm<br>( <i>Hananassaa, Gogosca</i> )  | <i>Bridelia micrantha</i> (Hochst.) Baill.                | Euphorbiaceae | Muka Chito (Muka Morma) | Ha & De 17  | Leaves    | Crushed, mixed with water                                    | Topical                 | Washing/bathing        | Fresh                  |
| Nose bleeding<br>( <i>Fununa</i> )           | <i>Solanum incanum</i> L.                                 | Solanaceae    | Hiddii                  | HA & De 16  | Leaves    | Squeezed, used alone                                         | Nasal                   | Dropping               | Fresh                  |
| Ophthalmia<br>( <i>Dhukuba Eja</i> )         | <i>Bidens pilosa</i> L.                                   | Asteraceae    | Darbattaa               | Ha & De 102 | Leaves    | Squeezing, concoction                                        | Optical                 | Dropping               | Fresh                  |
|                                              | <i>Hypoestes triflora</i> (Forssk.) Roem. & Schult.       | Acanthaceae   | Togoo                   | Ha & De 9   | Leaves    | Squeezed with water                                          | Optical                 | Topical application    | Fresh                  |
|                                              | <i>Calpurnia aurea</i> (Ait.) Benth.                      | Fabaceae      | Ceekaa                  | Ha & De 39  | Leaves    | Squeezing, concoction                                        | Optical                 | Dropping               | Fresh                  |
| Otorrhoea<br>( <i>Dhukuba Guraa</i> )        | <i>Plectranthus rupestris</i> Vatke ex Baker              | Lamiaceae     | Balajuu                 | Ha & De 47  | Leaves    | Crushed, squeezed with water                                 | Auricular               | Dropping               | Fresh                  |
|                                              | <i>Clematis hirsuta</i> Perr. & Guill.                    | Ranunculaceae | Fitii                   | Ha & De 99  | Leaves    | Crushed, squeezed with water                                 | Auricular               | Dropping               | Fresh                  |

Additional file 2 (Continued)

| Human Disease                                        | Scientific name                                           | Family         | Local name         | Voucher     | Part Used                | Methods of preparation              | Route of administration | Methods of application | Condition of part used |
|------------------------------------------------------|-----------------------------------------------------------|----------------|--------------------|-------------|--------------------------|-------------------------------------|-------------------------|------------------------|------------------------|
| Otorrhoea<br>( <i>Dhukuba Guraa</i> )                | <i>Myrica salicifolia</i> A. Rich.                        | Myricaceae     | Nolee              | Ha & De 59  | Leaves                   | Crushed, squeezed with water        | Auricular               | Dropping               | Fresh                  |
|                                                      | <i>Calpurnia aurea</i> (Ait.) Benth.                      | Fabaceae       | Ceekaa             | Ha & De 39  | Leaves                   | Crushed, squeezed with water        | Auricular               | Dropping               | Fresh                  |
|                                                      | <i>Englerina woodfordioides</i> (Schweinf.) M. Gilbert    | Loranthaceae   | Harmee             | Ha & De 51  | Leaves                   | Crushed, squeezed with water        | Auricular               | Dropping               | Fresh                  |
| Otorrhoea<br>( <i>Guraa Maluu</i> )                  | <i>Crotalaria spinosa</i> Hochst. ex Benth.               | Fabaceae       | Code A             | Ha & De 77  | Root                     | Pounded, powdered, mixed with water | Auricular               | Dropping               | Dried                  |
| Oversweating and fever<br>( <i>Lelabna Jemuqet</i> ) | <i>Justicia schimperiana</i> (Hochst. ex Nees) T. Anders. | Acanthaceae    | Dhumugaa           | Ha & De 26  | Leaves                   | Squeezing, used alone               | Oral                    | Drinking               | Fresh                  |
| Poisoning<br>( <i>Merz lebela sew</i> )              | <i>Datura stramonium</i> L.                               | Solanaceae     | Asangiraa          | Ha & De 38  | Leaves (apical meristem) | Crushed, squeezed, used alone       | Oral                    | Drinking               | Fresh                  |
| Rabies<br>( <i>Dhukuba seree</i> )                   | <i>Salix subserrata</i> Willd.                            | Salicaceae     | Aleltu             | HA & De 53  | Leaves                   | Crushed, mixed with water & milk    | Oral                    | Drinking               | Fresh                  |
|                                                      | <i>Afrocarpus falcatus</i> (Thunb.) C. N. Page            | Podocarpaceae  | Birbirsa           | Ha & De 107 | Leaves                   | Crushed, mixed with water & milk    | Oral                    | Drinking               | Fresh                  |
| Rabies<br>( <i>Labedewusha</i> )                     | <i>Ricinus communis</i> L.                                | Euphorbiaceae  | Koboo              | Ha & De 40  | Leaves                   | Pounding, squeezed, mixed with milk | Oral                    | Drinking               | Fresh                  |
| Rabies ( <i>Wusha Jenekesew sew</i> )                | <i>Ricinus communis</i> L.                                | Euphorbiaceae  | Koboo              | Ha & De 40  | Leaves                   | Extracted with tea                  | Oral                    | Drinking               | Fresh                  |
| Rheumatism<br>( <i>Gnaataa</i> )                     | <i>Dregea schimperi</i> (Decne.) Bullock                  | Asclepiadaceae | Hida Adii/Haayotee | Ha & De 25  | Leaves                   | Squeezed with water                 | Topical                 | Washing                | Fresh                  |
|                                                      | <i>Plumbago zeylanica</i> L.                              | Plumbaginaceae | Umeeraa            | Ha & De 11  | Root                     | Powdered, decoction                 | Oral                    | Drinking               | Dried                  |
|                                                      | <i>Clutia abyssinica</i> Jaub. & Spach.                   | Euphorbiaceae  | Tasuu              | Ha & De 74  | Leaves                   | Crushed, mixed with water           | Oral, Topical           | Drinking, washing      | Fresh                  |
|                                                      | <i>Momordica foetida</i> Schumach.                        | Cucurbitaceae  | Hidda Boffaa/Buqee | Ha & De 48  | Leaves                   | Squeezed with water                 | Topical                 | Washing                | Fresh                  |
|                                                      | <i>Croton macrostachyus</i> Del.                          | Euphorbiaceae  | Makanissaa         | Ha & De 6   | Leaves                   | Squeezed with water                 | Topical                 | Washing                | Fresh                  |

Additional file 2 (Continued)

| Human Disease                                                                            | Scientific name                                                            | Family         | Local name               | Voucher                            | Part Used        | Methods of preparation                                                                   | Route of administration | Methods of application   | Condition of part used |
|------------------------------------------------------------------------------------------|----------------------------------------------------------------------------|----------------|--------------------------|------------------------------------|------------------|------------------------------------------------------------------------------------------|-------------------------|--------------------------|------------------------|
| Rheumatism<br>( <i>Gnaataa</i> )                                                         | <i>Justicia schimperiana</i><br>(Hochst. ex Nees) T.<br>Anders.            | Acanthaceae    | Dhumugaa                 | Ha & De<br>26                      | Leaves           | Squeezed with<br>water                                                                   | Topical                 | Washing                  | Fresh                  |
|                                                                                          | <i>Ocimum gratissimum</i> L.                                               | Lamiaceae      | Hancabii                 | Ha & De<br>93                      | Leaves           | Squeezed with<br>water                                                                   | Topical                 | Washing                  | Fresh                  |
|                                                                                          | <i>Calpurnia aurea</i> (Ait.)<br>Benth.                                    | Fabaceae       | Ceekaa                   | Ha & De<br>39                      | Leaves           | Squeezed with<br>water                                                                   | Topical                 | Washing                  | Fresh                  |
|                                                                                          | <i>Bersama abyssinica</i><br>Fresen.                                       | Melianthaceae  | Lolchissaa               | Ha & De<br>70                      | Leaves           | Crushed, mixed<br>with water                                                             | Oral, Topical           | Drinking,<br>washing     | Fresh                  |
|                                                                                          | <i>Clausena anisata</i><br>(Willd.) Benth.                                 | Rutaceae       | Ulmaye                   | Ha & De<br>37                      | Leaves           | Crushed, mixed<br>with water                                                             | Oral, Topical           | Drinking,<br>washing     | Fresh                  |
|                                                                                          | <i>Justicia schimperiana</i><br>(Hochst. ex Nees) T.<br>Anders.            | Acanthaceae    | Dhumugaa                 | Ha & De<br>26                      | Leaves           | Squeezed with<br>water                                                                   | Topical                 | Topical<br>application   | Fresh                  |
|                                                                                          | <i>Croton macrostachyus</i><br>Del.                                        | Euphorbiaceae  | Makanissaa               | Ha & De<br>6                       | Leaves           | Squeezed with<br>water                                                                   | Topical                 | Topical<br>application   | Fresh                  |
|                                                                                          | <i>Celtis africana</i> Burm.f.                                             | Ulmaceae       | Mataqoma (Muka<br>Morma) | Ha & De<br>54                      | Leaves           | Squeezed with<br>water                                                                   | Topical                 | Topical<br>application   | Fresh                  |
| Rheumatism<br>( <i>Qora</i> )                                                            | <i>Plumbago zeylanica</i> L.                                               | Plumbaginaceae | Umeeraa                  | Ha & De<br>11                      | Root             | Powdered, mixed<br>with water,<br>honey, garlic,<br><i>Nigela sativa</i>                 | Oral                    | Swallowing               | Dried                  |
| Rheumatism<br>( <i>Sanba</i><br><i>Naqarsa</i> )                                         | <i>Croton macrostachyus</i><br>Del.                                        | Euphorbiaceae  | Makanissaa               | Ha & De<br>6                       | Stem bark        | Pounding, or<br>powdering,<br>mixed with water<br>or 'aguat' or tea                      | Oral                    | Drinking                 | Fresh or<br>dried      |
| Ringworm &<br>Tinea versicolor<br>( <i>Chirtna</i><br><i>quaqucha</i> )<br><i>Rissaa</i> | <i>Olea europae</i> L. subsp.<br><i>cuspidata</i> (Wall. ex<br>G.Don) Cif. | Oleaceae       | Ejersa                   | Ha & De<br>76                      | Stem oil         | Extracting oil by<br>boiling stem                                                        | Topical                 | Ointment                 | Fresh                  |
|                                                                                          | <i>Clerodendrum</i><br><i>myricoides</i> (Hochst.)<br>Vatke                | Lamiaceae      | Free<br><br>Qitel        | Ha & De<br>82<br><br>Ha & De<br>82 | Root<br><br>Root | Crushed,<br>pounded, mixed<br>with water<br><br>Crushed,<br>pounded, mixed<br>with water | Oral<br><br>Oral        | Drinking<br><br>Drinking | Fresh<br><br>Fresh     |

Additional file 2 (Continued)

| Human Disease                        | Scientific name                                        | Family         | Local name         | Voucher    | Part Used | Methods of preparation                           | Route of administration | Methods of application         | Condition of part used |
|--------------------------------------|--------------------------------------------------------|----------------|--------------------|------------|-----------|--------------------------------------------------|-------------------------|--------------------------------|------------------------|
| <i>Rissaa</i>                        | <i>Desmodium repandum</i> (Vahl) DC.                   | Fabaceae       | Shicha             | Ha & De 67 | Leaves    | Crushed, used alone                              | Topical                 | Topical application            | Fresh                  |
|                                      | <i>Croton macrostachyus</i> Del.                       | Euphorbiaceae  | Makanissaa         | Ha & De 6  | Leaves    | Concoction, Crushed, mixed with water            | Oral                    | Drinking                       | Fresh                  |
|                                      | <i>Cyathula uncinulata</i> (Shrad.) Schinz             | Amaranthaceae  | Matane             | Ha & De 29 | Leaves    | Concoction, Crushed, mixed with water            | Oral                    | Drinking                       | Fresh                  |
| Scabies ( <i>Ciitto</i> )            | <i>Maesa lanceolata</i> Forssk.                        | Myrsinaceae    | Eija Abbayi        | Ha & De 43 | Seeds     | Powdering, mixed with edible oil                 | Topical                 | Topical application            | Dried                  |
|                                      | <i>Englerina woodfordioides</i> (Schweinf.) M. Gilbert | Loranthaceae   | Harmee             | Ha & De 51 | Roots     | Crushed, mixed with water & baseline             | Topical                 | Ointment                       | Fresh                  |
| Skin crack ( <i>Milla Dhodoi</i> )   | <i>Alysicarpus quartinianus</i> A. Rich.               | Fabaceae       | Hadhaa/Korcha      | Ha & De 15 | Stem bark | Powdering, decoction                             | Oral                    | Drinking                       | Dried                  |
| Snake bite ( <i>Cininee</i> )        | <i>Cynodon dactylon</i> (L.) Pers.                     | Poaceae        | Margaa (Chekorsa)  | Ha & De 19 | Leaves    | Squeezed with water                              | Oral                    | Drinking                       | Fresh                  |
|                                      | <i>Cassia arereh</i> Del.                              | Fabaceae       | Botoroo            | Ha & De 18 | Stem bark | Powdering, mixed with tea                        | Oral                    | Drinking                       | Dried                  |
| Stabbing pain ( <i>Woransa</i> )     | <i>Stephania abyssinica</i> (Dillon & A. Rich.) Walp.  | Menispermaceae | Kalala             | Ha & De 72 | Leaves    | Powdering, used alone                            | Oral                    | Smoking                        | Dried                  |
| Stabbing pain ( <i>wugat</i> )       | <i>Carissa spinarum</i> L.                             | Apocynaceae    | Hagamssaa          | Ha & De 90 | Leaves    | Smoke bath                                       | Smoke bath              | Smoke bath                     | Fresh                  |
| Stomachache ( <i>Garaa Kutataa</i> ) | <i>Clerodendrum myricoides</i> (Hochst.) Vatke         | Lamiaceae      | Marasisa           | Ha & De 82 | Root      | Extracted with cold water                        | Oral                    | Drinking                       | Fresh                  |
|                                      | <i>Plumbago zeylanica</i> L.                           | Plumbaginaceae | Umeeraa            | Ha & De 11 | Root      | Extracted with cold water                        | Oral                    | Drinking                       | Fresh                  |
| Stress ( <i>Hiirenaa</i> )           | <i>Solanecio angulatus</i> (Vahl) C. Jeffrey           | Asteraceae     | haqarqaraa/ gabisa | Ha & De 12 | Leaves    | Crushed, mixed with butter                       | Topical                 | Topical application            | Fresh                  |
| Stress ( <i>Ye aimiro chinqet</i> )  | <i>Caesalpinia decapetala</i> (Roth) Alston            | Fabaceae       | Arangama Gurachaa  | Ha & De 36 | Stem bark | Powdered, wrapped with cotton clothe, used alone | Nasal                   | Sniffing                       | Dried                  |
| Tinea versicolor ( <i>Sono</i> )     | <i>Dioscorea praehensilis</i> Benth.                   | Dioscoreaceae  | Wociinoo           | Ha & De 31 | Leaves    | Crushed, used alone                              | Topical                 | Brushing (Topical application) | Fresh                  |
| Tonsillitis ( <i>Huuba Qonqoo</i> )  | <i>Flacourtia indica</i> (Burm. f.) Merr.              | Flacourtiaceae | Akokoo             | Ha & De 33 | Leaves    | used alone (No body contact)                     | No body contact         | Spiritual                      | Dried                  |



Additional file 2 (Continued)

| Human Disease                                        | Scientific name                                  | Family         | Local name              | Voucher     | Part Used | Methods of preparation                | Route of administration     | Methods of application      | Condition of part used |
|------------------------------------------------------|--------------------------------------------------|----------------|-------------------------|-------------|-----------|---------------------------------------|-----------------------------|-----------------------------|------------------------|
| Tonsillitis<br>( <i>Huuba Qonqoo</i> )               | <i>Acmella coulirhiza</i> Del.                   | Asteraceae     | Gororsa                 | Ha & De 42  | Flower    | Crushed, used alone                   | Oral                        | Chewing and swallowing      | Fresh                  |
|                                                      | <i>Cynodon dactylon</i> (L.) Pers.               | Poaceae        | Chekorsaa               | Ha & De 19  | Leaves    | used alone (No body contact)          | No body contact             | Spiritual                   | Dried                  |
| Toothache<br>( <i>Dhukuba Ilkani</i> )               | <i>Premna schimperi</i> Engl.                    | Verbenaceae    | Urgessa                 | Ha & De 4   | Leaves    | Used alone                            | Dental                      | Chewing                     | Fresh                  |
|                                                      | <i>Calpurnia aurea</i> (Ait.) Benth.             | Fabaceae       | Ceekaa                  | Ha & De 39  | Leaves    | Crushed, used alone                   | Oral                        | Smoking                     | Dried                  |
|                                                      | <i>Cyathula uncinulata</i> (Shrad.) Schinz       | Amaranthaceae  | Metenaa                 | Ha & De 29  | Root      | Used alone                            | Dental                      | Chewing                     | Fresh                  |
| Tumor<br>( <i>Tanachaa</i> )                         | <i>Tapinanthus globiferus</i> (A. Rich.) Tieghem | Loranthaceae   | Dheertu Makanissaa      | Ha & De 98  | Leaves    | Crushed, mixed with water             | Oral                        | Drinking, Swallowing        | Fresh                  |
|                                                      | <i>Gloriosa superba</i> L.                       | Colchicaceae   | Dawaurahman/Rah maldawa | Ha & De 3   | Root      | Powdering, given with tea & coffee    | Oral                        | Drinking                    | Dried                  |
|                                                      | <i>Plumbago zeylanica</i> L.                     | Plumbaginaceae | Umeeraa                 | Ha & De 11  | Root      | Powdered, mixed with water and sugar  | Oral                        | Drinking                    | Dried                  |
|                                                      | <i>Plumbago zeylanica</i> L.                     | Plumbaginaceae | Umeeraa                 | Ha & De 11  | Twigs     | Used alone                            | Put on the neck as necklace | Put on the neck as necklace | Fresh or dried         |
| Unable to urinate<br>( <i>Dhukuba Garaa Itesuu</i> ) | <i>Gloriosa superba</i> L.                       | Colchicaceae   | Dawaurahman/Rah maldawa | Ha & De 3   | Root      | Crushed, mixed with water             | Oral                        | Drinking                    | Fresh                  |
|                                                      | <i>Phytolacca dodecandra</i> L'Hérit.            | Phytolaccaceae | Andodee                 | Ha & De 106 | Root      | Pounding, mixed with water and butter | Oral                        | Drinking                    | Fresh                  |
| Wound<br>( <i>Qushuuri</i> )                         | <i>Sida ovata</i> Forssk.                        | Malvaceae      | Karaabaa                | Ha & De 87  | Leaves    | Crushed, used alone                   | Topical                     | Topical application         | Fresh                  |
